# Supplementary material for: Construction and drug delivery of a fluorescent TPE-bridged cyclodextrin/hyaluronic acid supramolecular assembly
Source: Royal Society of Chemistry journal article supplement (doi:10.1039/c6ra07572j), 2016-01-01
Supplement: c6ra07572j1.pdf [file c6ra07572j1.pdf]

**Supporting Information for**

**Construction and Drug Delivery of A Fluorescent TPE-bridged  
Cyclodextrin/Hyaluronic Acid Supramolecular Assembly**

Qian Zhao,<sup>1</sup> Yong Chen,<sup>1</sup> Mo Sun,<sup>1</sup> Xian-Jing Wu<sup>1</sup> and Yu Liu<sup>1,2\*</sup>

<sup>1</sup> Department of Chemistry, State Key Laboratory of Elemento-Organic Chemistry,  
Nankai University, Tianjin, 300071, P. R. China, E-mail: yuliu@nankai.edu.cn

<sup>2</sup> Collaborative Innovation Center of Chemical Science and Engineering (Tianjin),  
Nankai University, Tianjin, 300071, P. R. China

\*Address correspondence to yuliu@nankai.edu.cn

### Synthesis of **1**<sup>1</sup>

Zinc powder (10 g), 2 mL acetic acid and 50 mL H<sub>2</sub>O were mixed and stirred at room temperature for 30 minutes, then the activated zinc powder was gained by filtration and desiccation. Zn dust (3.3 g, 50 mmol) was added to a solution of TiCl<sub>4</sub> (2.75 mL, 25 mmol) in 60 ml of dry THF. After refluxing for 2 hours, 1ml pyridine and 4,4'-dimethoxybenzophenone (6.01 g, 25 mmol) in 60 ml THF were added. After refluxing for 20 hours, the reaction was cooled and stopped with K<sub>2</sub>CO<sub>3</sub> (5g) aqueous solution. The mixture was extracted by dichloromethane and the organic phase was collected and evaporated under vacuum. Then TPE derivative **1** was gained by recrystallization using dichloromethane and petroleum ether in 90% yield. <sup>1</sup>H NMR (400 MHz, CDC13) δ 6.93 (d, J = 8.7 Hz, 8H), 6.63 (d, J = 8.7 Hz, 8H), 3.74 (s, 12H).

### Synthesis of **β-CD azide**<sup>2</sup>

At room temperature, 280 g β-CD, 28 g NaOH and 2 L H<sub>2</sub>O were mixed and stirred for 30 minutes. Then 40 g p-toluenesulfonyl chloride in 90 mL CH<sub>3</sub>CN was added in 30 minutes, Following by another 2 hours stirring and suction filtration to give a crude p-toluenesulfonyl modified β-CD. Then 15 g NaN<sub>3</sub> and 250 mL H<sub>2</sub>O were mixed with the prepared p-toluenesulfonyl modified β-CD and the mixture was stirred at 80 °C for 5 hours. After cooling down, the mixture was dropwise added to 1000 mL acetone and then β-CD azide(total yield, 7%) was gained as white solid after filtration.

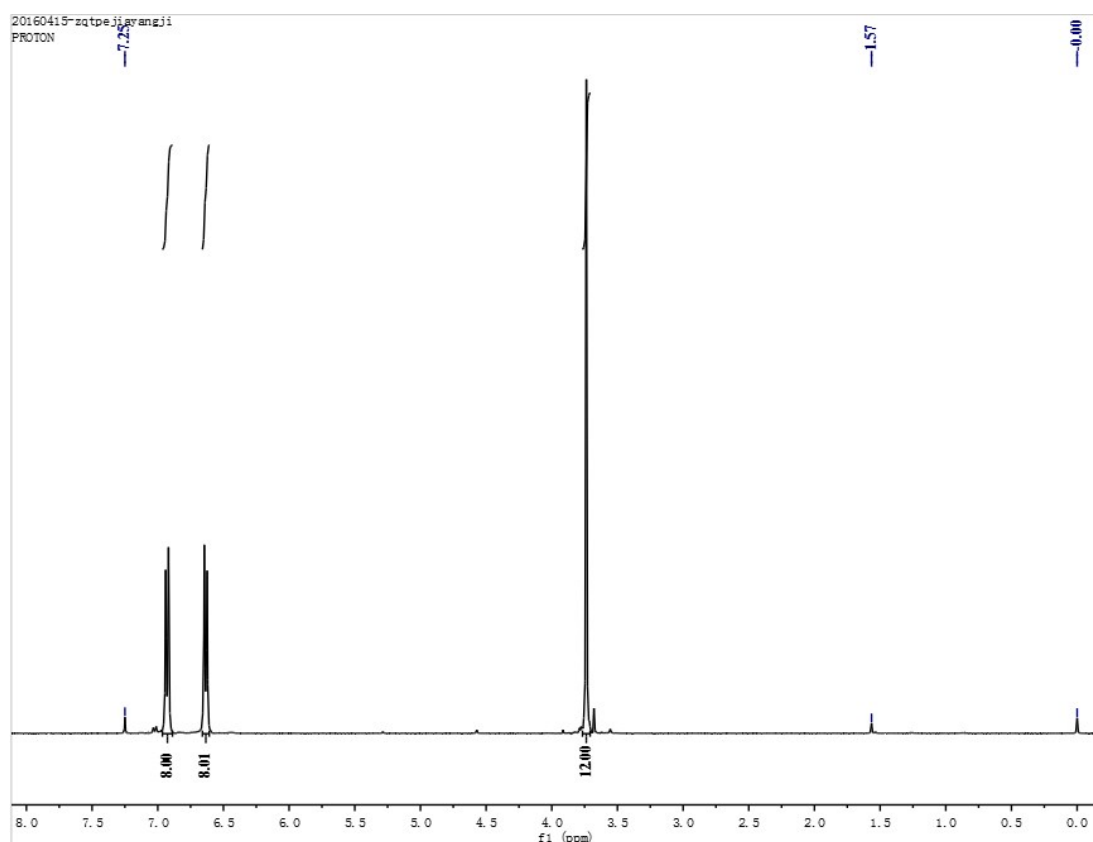

Figure S1. <sup>1</sup>H NMR of TPE derivative **1**

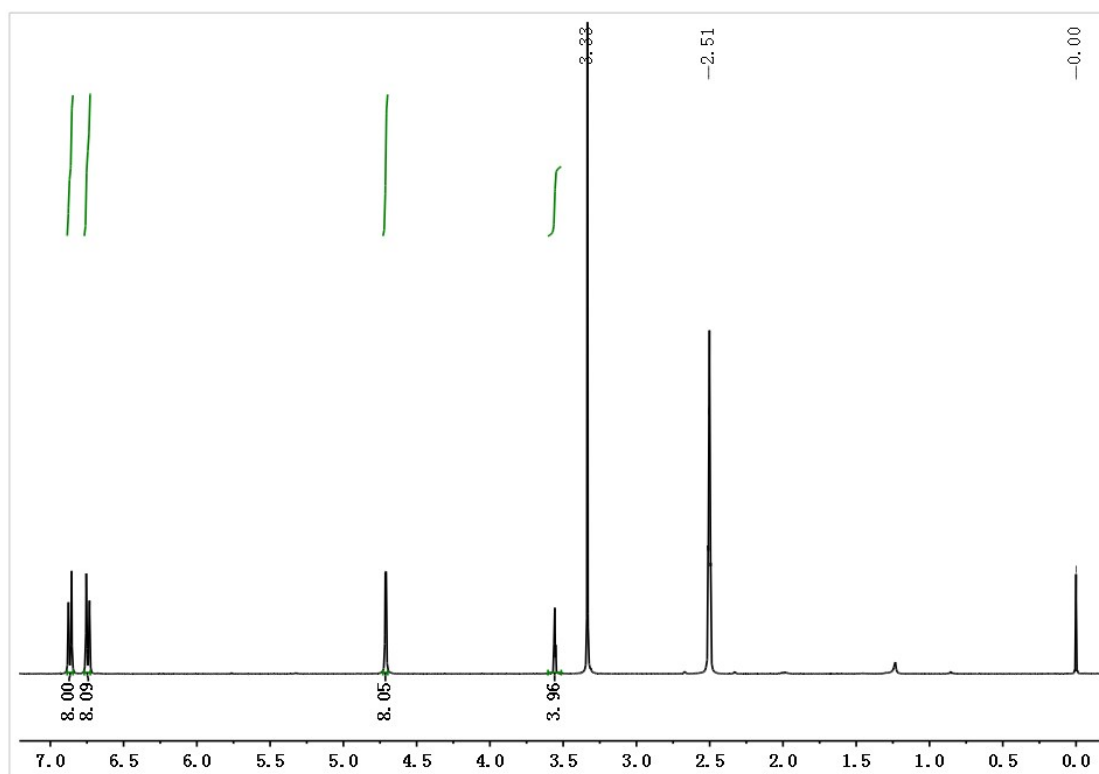

Figure S2.  $^1\text{H}$  NMR of TPE derivative 2

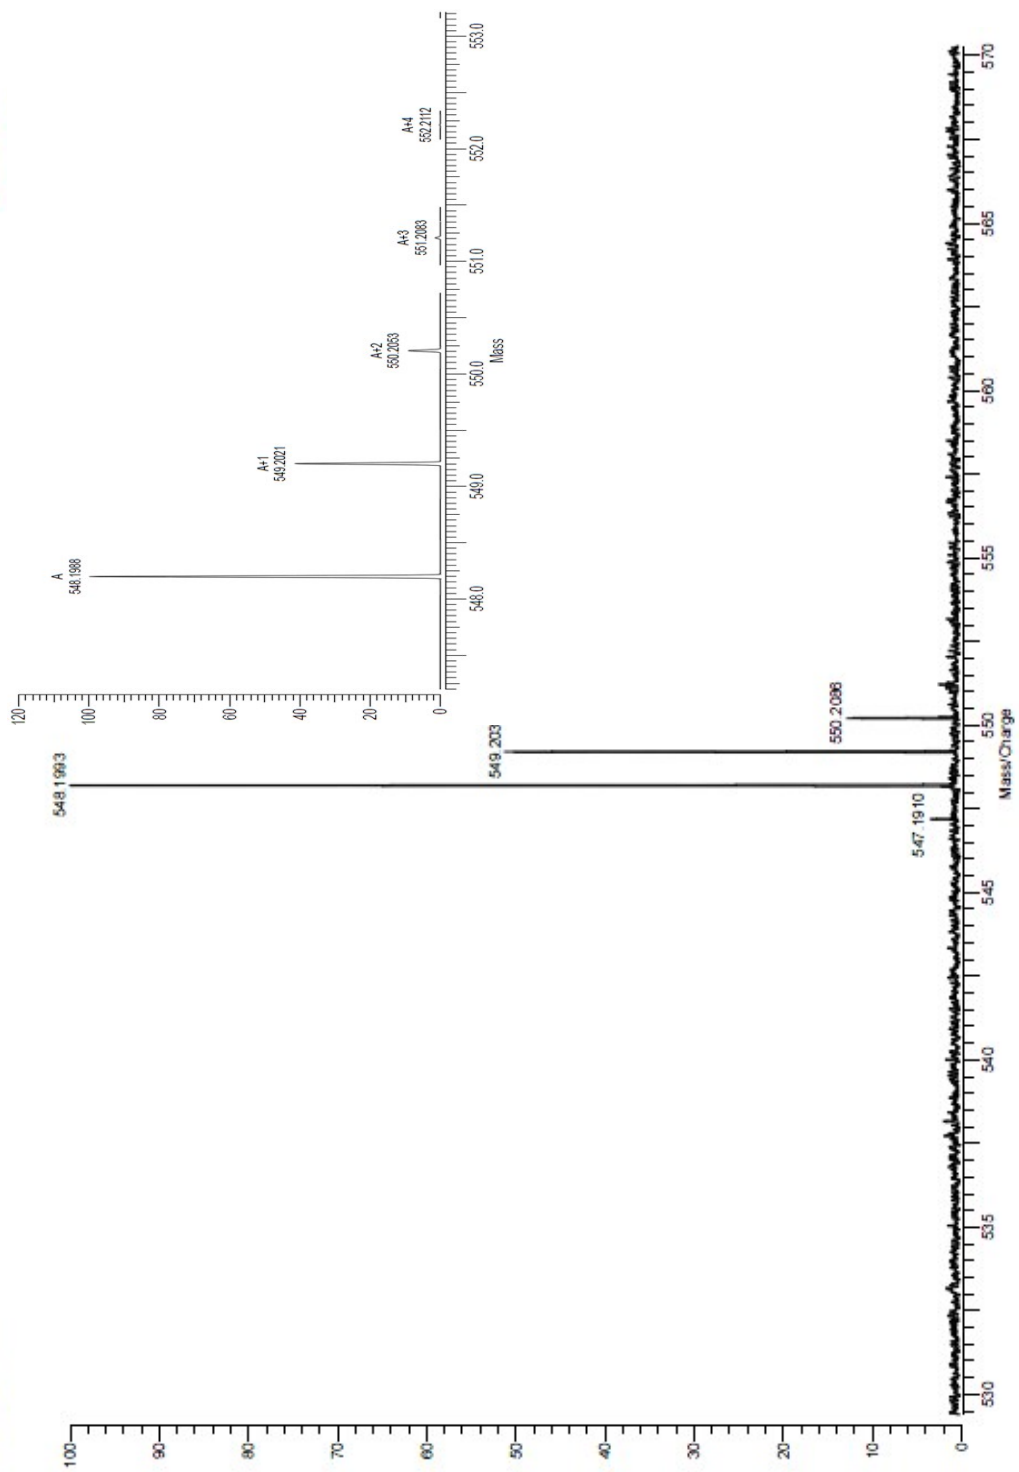

Figure S3. HRMS of TPE derivative 2 (insert: simulated spectrum)

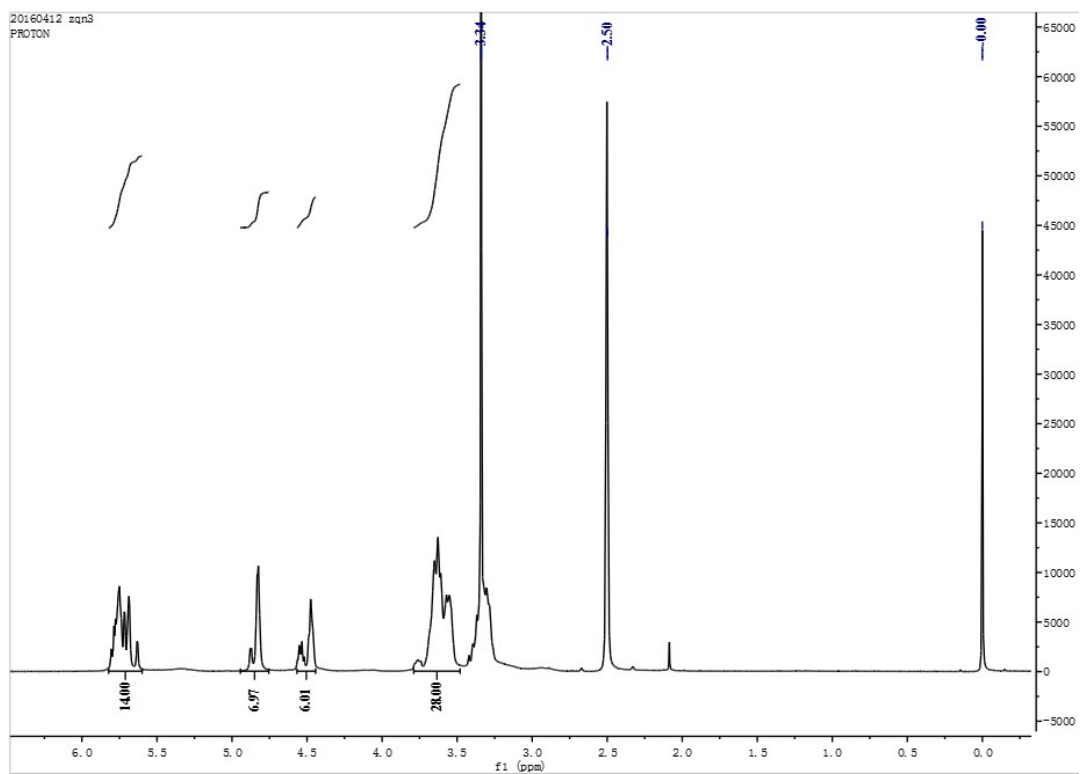

Figure S4.  $^1\text{H}$  NMR of  $\text{N}_3\text{-}\beta\text{-CD}$

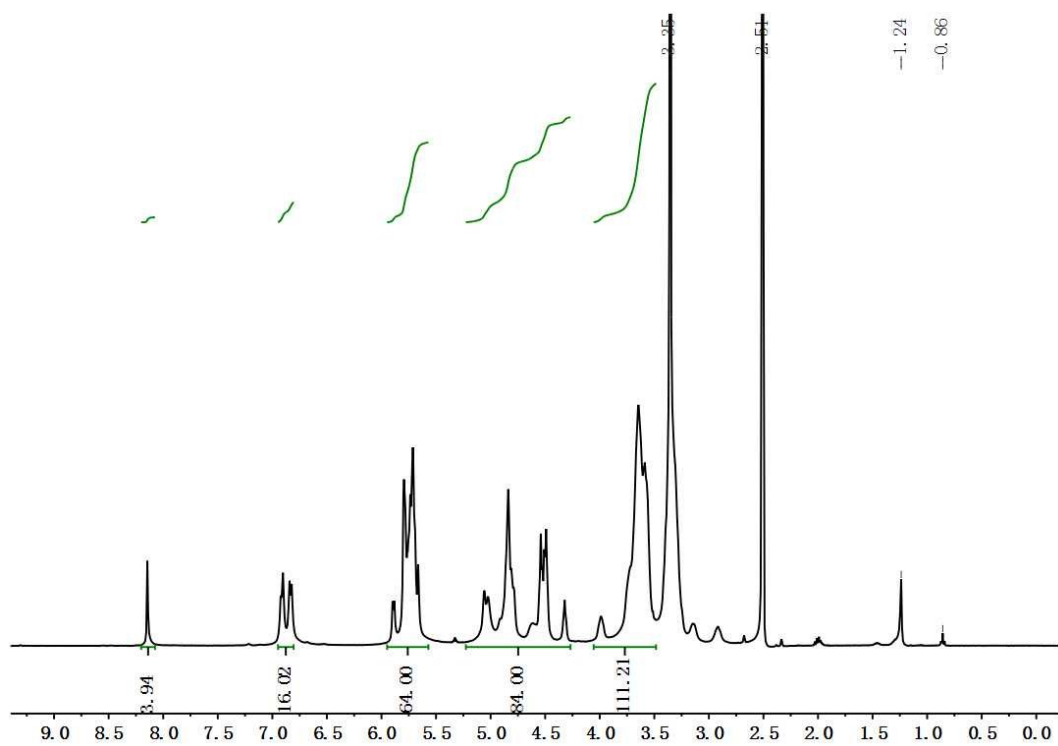

Figure S5.  $^1\text{H}$  NMR of TPECD

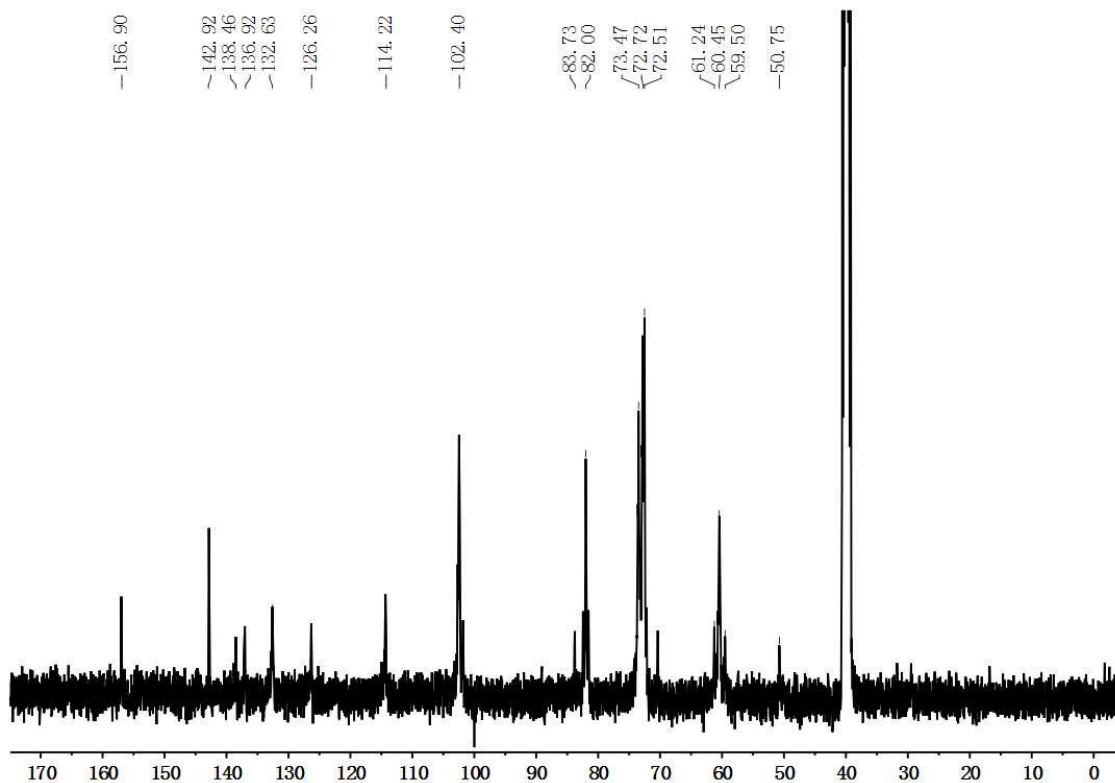

Figure S6.  $^{13}\text{C}$  NMR of TPECDD

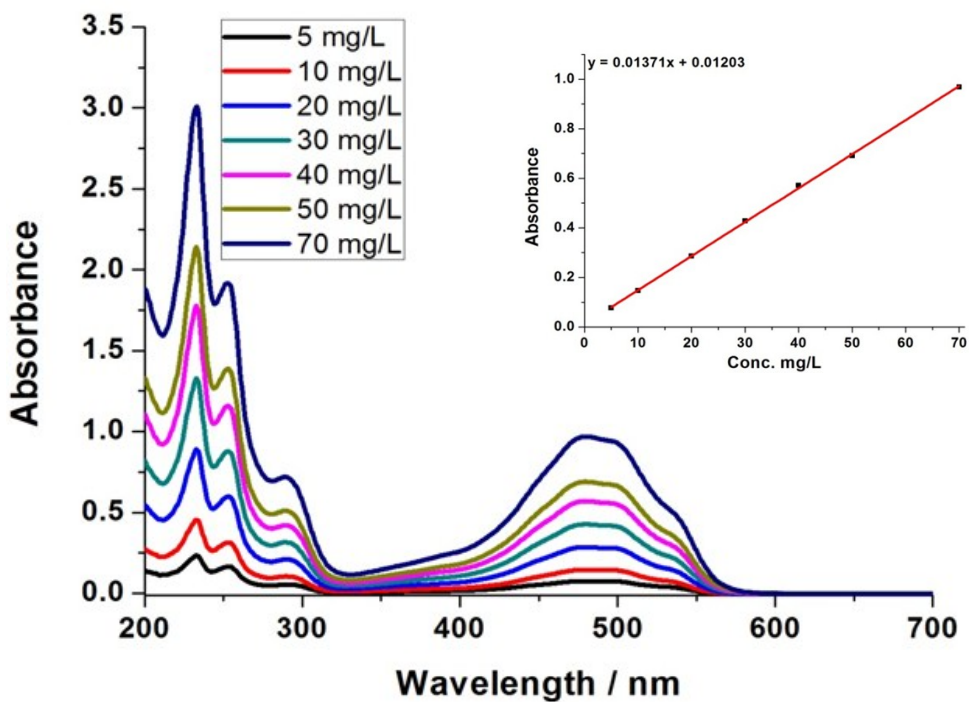

Figure S7. UV-Vis spectra of a series of concentrations of DOX in  $\text{H}_2\text{O}$  (Insert: Standard curve of DOX at 481nm)

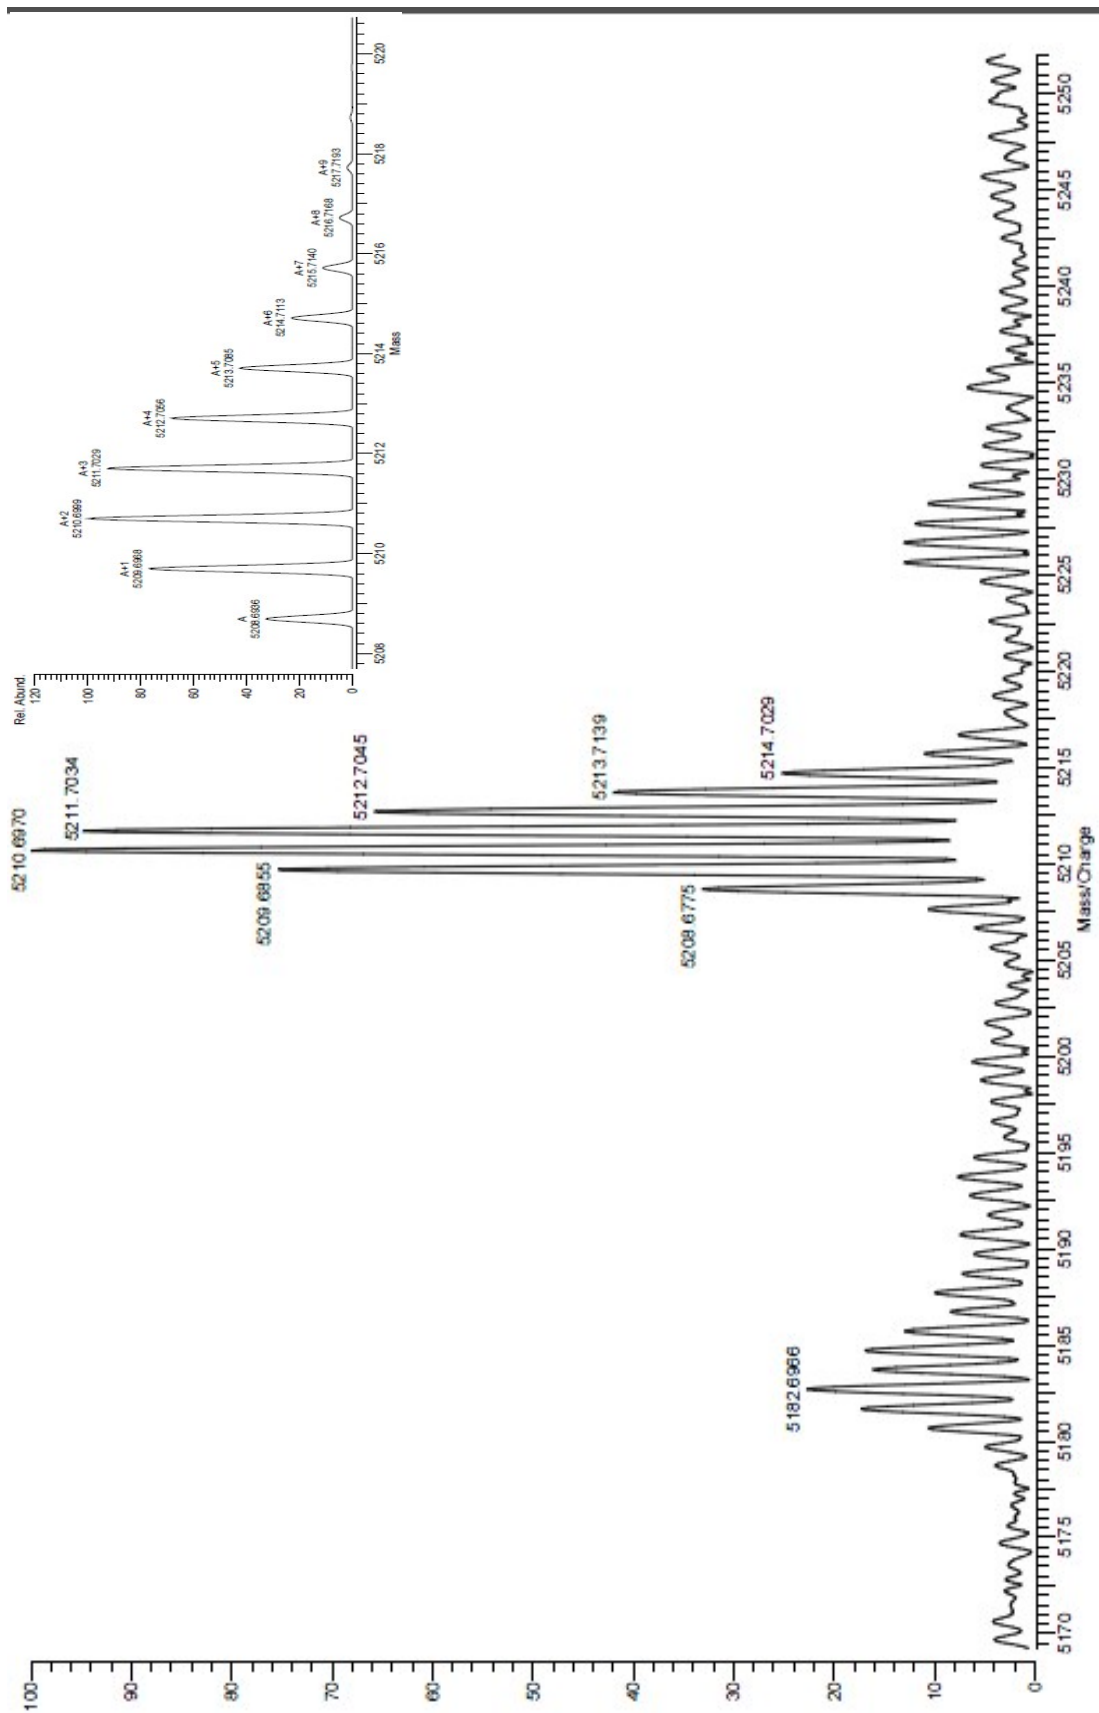

Figure S8. HRMS of TPECD (insert: simulated spectrum)

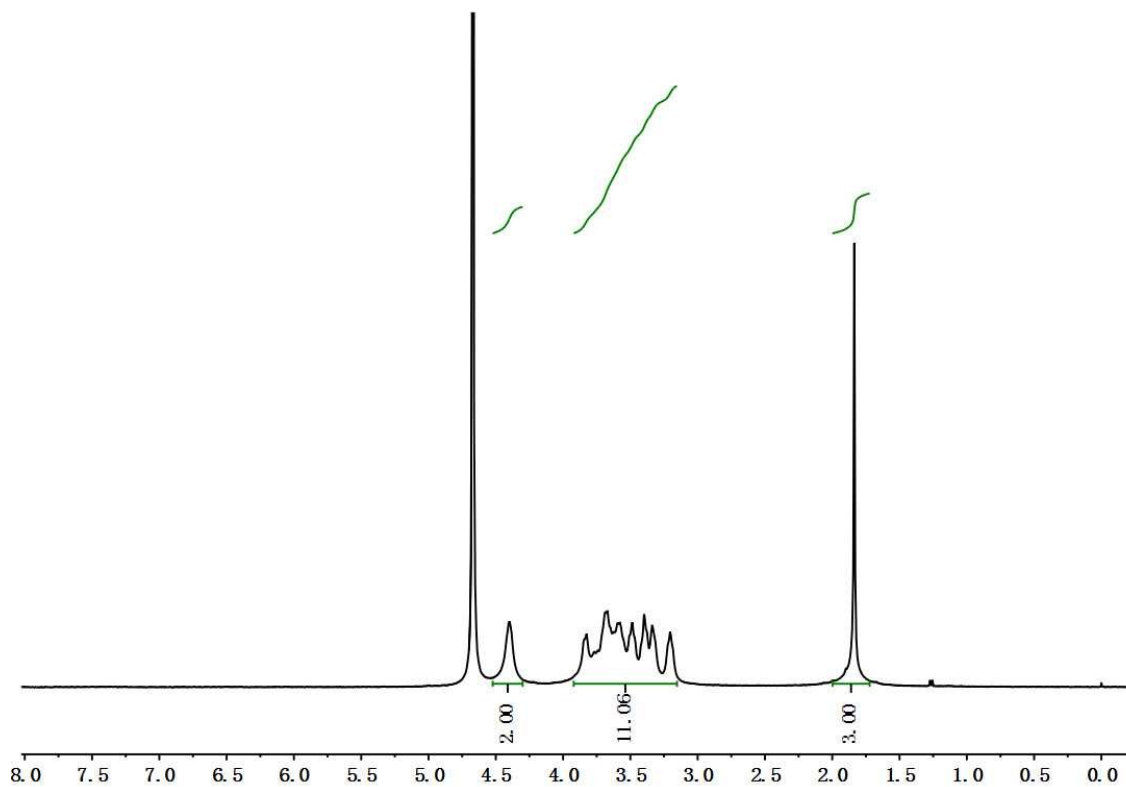

Figure S9. <sup>1</sup>H NMR of HA

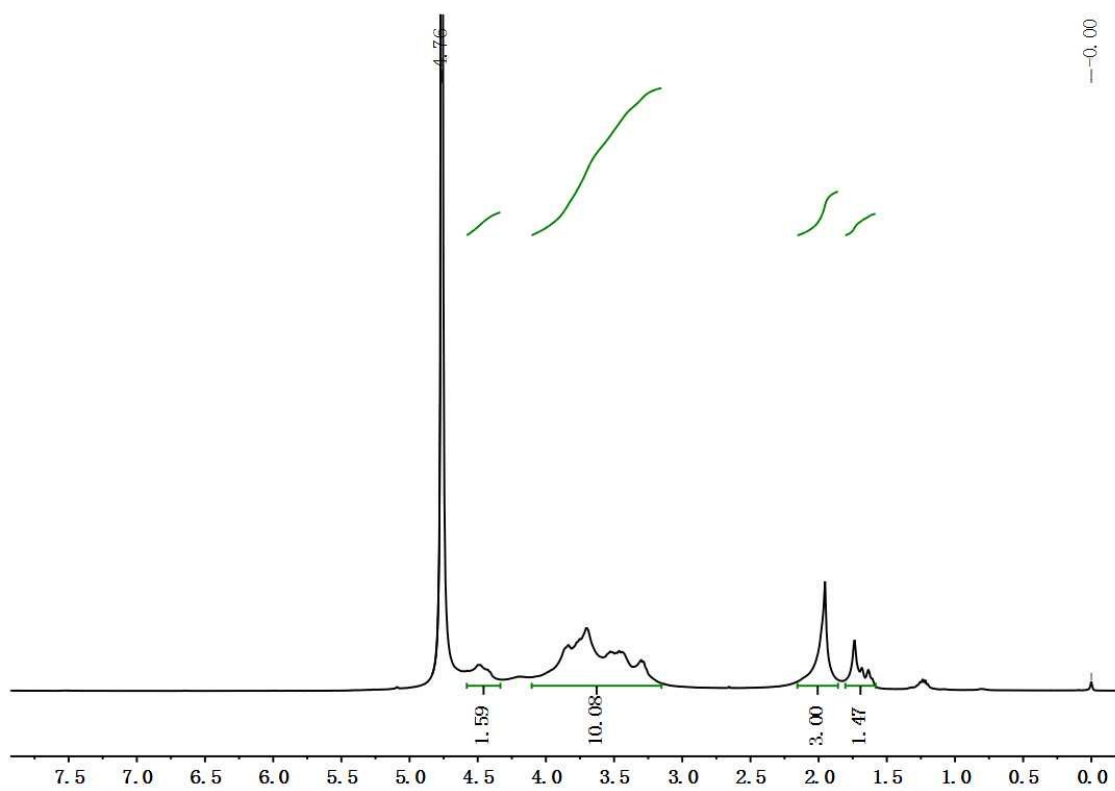

Figure S10. <sup>1</sup>H NMR of HAAD



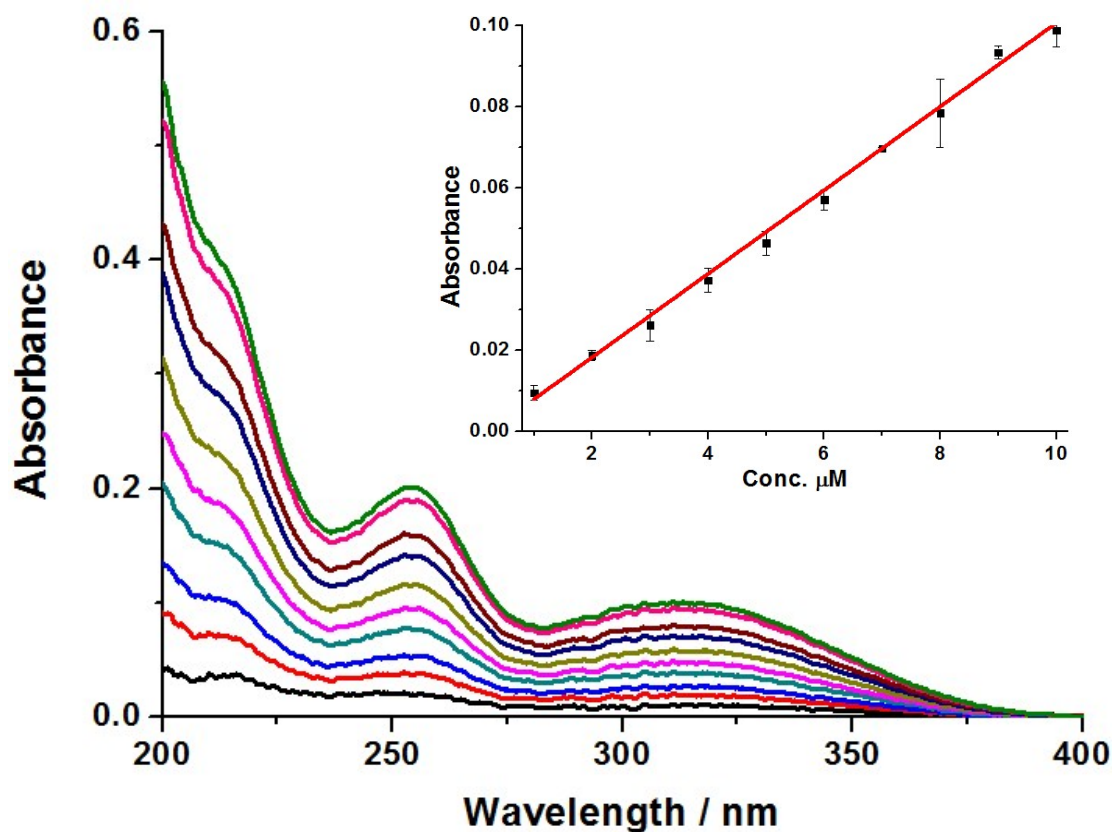

Figure S11. Concentration-dependent UV-Vis spectra (insert: liner fitting of absorption at 316 nm)

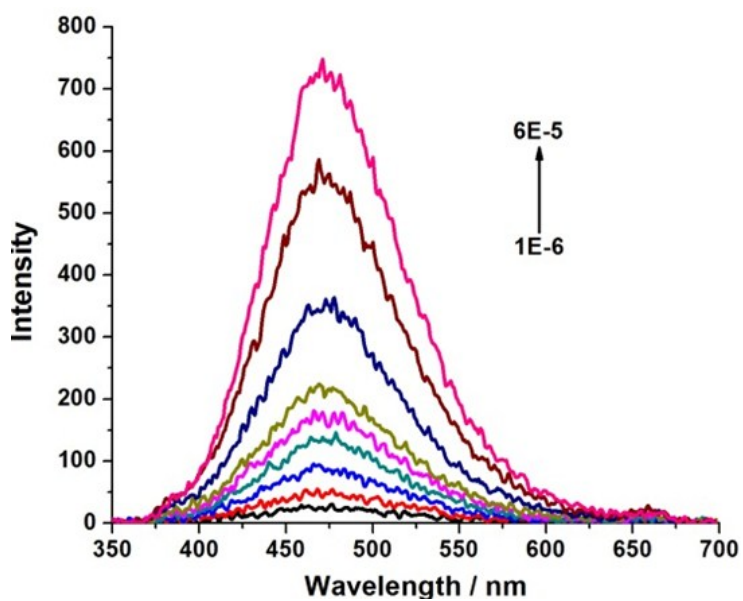

Figure S12. Fluorescence spectra (right,  $\lambda_{\text{ex}}=330\text{nm}$ ) of TPECD at different concentrations.

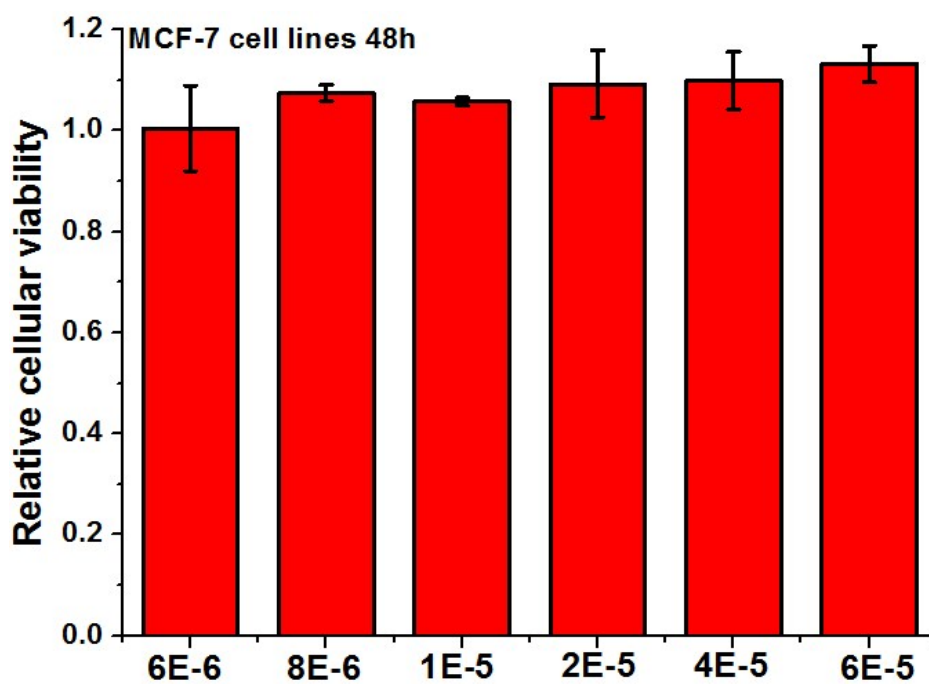

Figure S13. Relative cellular viability of MCF-7 cell lines after 48h of treatment with TPECD-HAAD of a series concentrations(calculated according to TPECD).

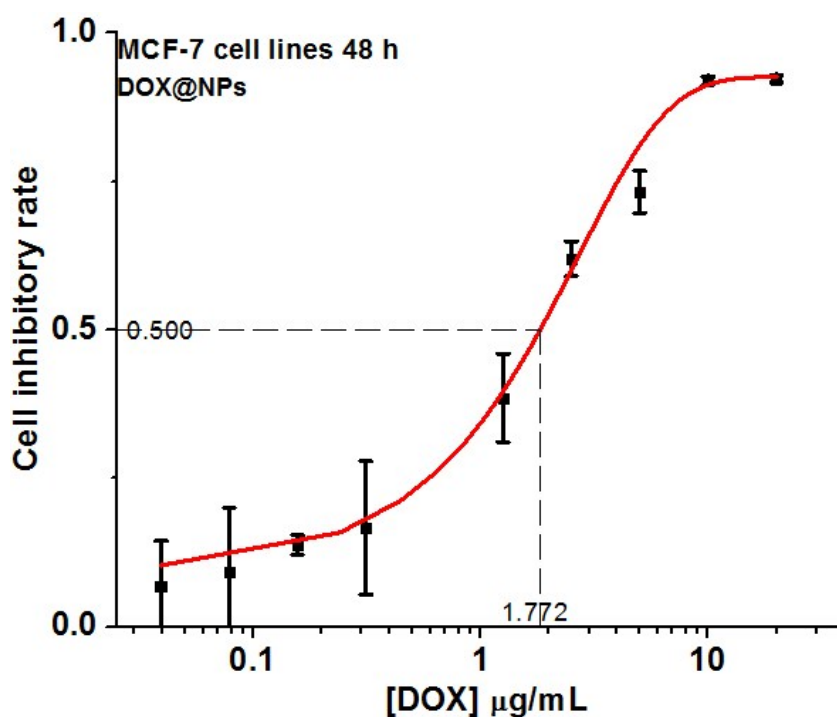

Figure S14. The inhibitory rate of MCF-7 cells at different concentrations of DOX@NPs after incubation for 48 h.

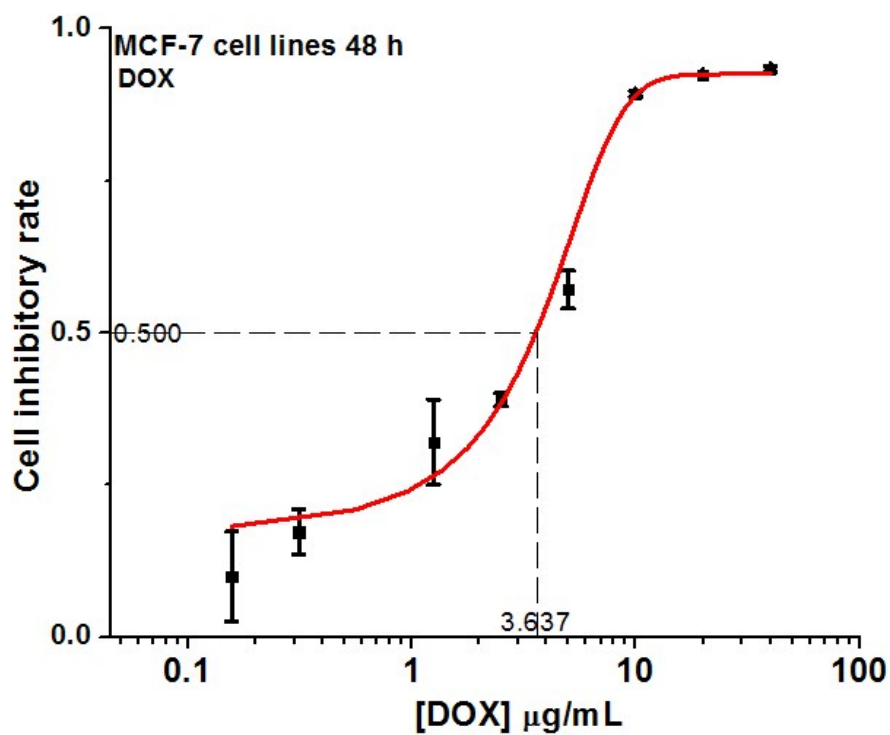

Figure S15. The inhibitory rate of MCF-7 cells at different concentrations of DOX after incubation for 48 h.

1. X.-M. Hu, Q. Chen, J.-X. Wang, Q.-Y. Cheng, C.-G. Yan, J. Cao, Y.-J. He and B.-H. Han, *Chem. Asian J.*, 2011, 6, 2376.
2. M. Sun, H.-Y. Zhang, X.-Y. Hu, B.-W. Liu and Y. Liu, *Chin. J. Chem.*, 2014, 32, 771.
